# Supplementary material for: Does Mental Well-Being Protect against Self-Harm Thoughts and Behaviors during Adolescence? A Six-Month Prospective Investigation
Source: MDPI journal article supplement (doi:10.3390/ijerph17186771), 2020-09-17

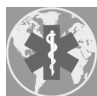

**Table S1.** Point estimates for indirect effects and 95% bias corrected confidence intervals for serial multiple mediation analysis in which defeat, and internal entrapment were represented as mediators in the association mental well-being and self-harm thoughts (controlling for gender, depression, and external entrapment).

| 95% Confidence Intervals <sup>a</sup>                  |                |              |              |
|--------------------------------------------------------|----------------|--------------|--------------|
| Mediation Path                                         | Point Estimate | Lower        | Upper        |
| Mental well-being > Defeat > SHT                       | -0.05          | -0.09        | -0.02        |
| Mental well-being > Internal Entrapment > SHT          | 0.01           | -0.01        | 0.01         |
| Mental well-being > Defeat > Internal Entrapment > SHT | -0.03          | -0.06        | -0.01        |
| <b>Total indirect effect</b>                           | <b>0.07</b>    | <b>-0.10</b> | <b>-0.05</b> |

<sup>a</sup> Statistical significance indicated by confidence intervals not containing 0; SHT—self-harm.

**Table S2.** Point estimates for indirect effects and 95% bias corrected confidence intervals for serial multiple mediation analysis in which defeat, and external entrapment were represented as mediators in the association between mental well-being and self-harm thoughts (controlling for gender, depression, and internal entrapment).

| 95% Confidence Intervals <sup>a</sup>                 |                |              |              |
|-------------------------------------------------------|----------------|--------------|--------------|
| Mediation Path                                        | Point Estimate | Lower        | Upper        |
| Mental well-being > Defeat > SHT                      | -0.05          | -0.09        | 0.05         |
| Mental well-being > External Entrapment > SHT         | 0.01           | 0.01         | 0.02         |
| Mental well-being > Defeat > External Entrapment > SH | -0.03          | -0.06        | -0.01        |
| <b>Total indirect effect</b>                          | <b>0.07</b>    | <b>-0.10</b> | <b>-0.05</b> |

<sup>a</sup> Statistical significance indicated by confidence intervals not containing 0; SHT—self-harm thoughts

**Table S3.** Point estimates for indirect effects and 95% bias corrected confidence intervals for serial multiple mediation analysis in which defeat, and internal entrapment were represented as mediators in the association mental well-being and self-harm behaviors (controlling for gender, depression, and external entrapment).

| 95% Confidence Intervals <sup>a</sup>                  |                |              |             |
|--------------------------------------------------------|----------------|--------------|-------------|
| Mediation Path                                         | Point Estimate | Lower        | Upper       |
| Mental well-being > Defeat > SHB                       | 0.01           | -0.04        | 0.09        |
| Mental well-being > Internal Entrapment > SHB          | 0.01           | -0.00        | 0.05        |
| Mental well-being > Defeat > Internal Entrapment > SHB | -0.04          | -0.12        | -0.01       |
| <b>Total indirect effect</b>                           | <b>-0.02</b>   | <b>-0.06</b> | <b>0.03</b> |

<sup>a</sup> Statistical significance indicated by confidence intervals not containing 0; SHB—self-harm behavior.

**Table S4.** Point estimates for indirect effects and 95% bias corrected confidence intervals for serial multiple mediation analysis in which defeat, and external entrapment were represented as mediators in the association between mental well-being and self-harm behaviors (controlling for gender, depression, and internal entrapment).

| Mediation Path                                         | 95% Confidence Intervals <sup>a</sup> |        |       |
|--------------------------------------------------------|---------------------------------------|--------|-------|
|                                                        | Point Estimate                        | Lower  | Upper |
| Mental well-being > Defeat > SHT                       | 0.004                                 | -0.026 | 0.055 |
| Mental well-being > External Entrapment > SHB          | -0.002                                | -0.012 | 0.005 |
| Mental well-being > Defeat > External Entrapment > SHB | 0.003                                 | -0.003 | 0.012 |
| <b>Total indirect effect</b>                           | 0.005                                 | -0.025 | 0.057 |

<sup>a</sup> Statistical significance indicated by confidence intervals not containing 0; SHT—self-harm thoughts; SHB—self-harm behavior.

**Table S5.** Point estimates for effects and 95% confidence intervals for moderation analysis in which mental well-being was represented as a moderator in the relationship between internal entrapment at baseline and prospective self-harm thoughts (controlling for gender, depression, and external entrapment).

| Moderations Path                              | $\beta$ | <i>p</i> | 95%CI       |
|-----------------------------------------------|---------|----------|-------------|
| Internal Entrapment → SHT                     | 0.31    | 0.005    | 0.09, 0.53  |
| Internal Entrapment x Mental Well-being → SHT | -0.01   | 0.165    | -0.02, 0.01 |

SHT—self-harm thoughts.

**Table S6.** Point estimates for effects and 95% confidence intervals for moderation analysis in which mental well-being was represented as a moderator in the relationship between external entrapment at baseline and prospective self-harm thoughts (controlling for gender, depression, and internal entrapment).

| Moderation Path                               | $\beta$ | <i>p</i> | 95%CI       |
|-----------------------------------------------|---------|----------|-------------|
| External Entrapment → SHT                     | 0.18    | .014     | 0.36, 0.33  |
| External Entrapment x Mental Well-being → SHT | -0.01   | 0.211    | -0.01, 0.00 |

SHT—self-harm thoughts.

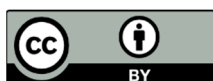

Supplement: s1 [file s1]
